# **A simple, safe and sensitive method for SARS-CoV-2 inactivation and RNA extraction for RT-qPCR**

Lelde Kalnina<sup>a,§</sup>, Àngels Mateu-Regué<sup>a,§</sup>, Stephanie Oerum<sup>b§</sup>, Annemette Hald<sup>c</sup>, Jan Gerstoff<sup>c</sup>,  
Henrik Oerum<sup>d</sup> Finn Cilius Nielsen<sup>a</sup>, Astrid K.N. Iversen<sup>e,\*</sup>.

<sup>a</sup>Center for Genomic Medicine, Rigshospitalet, The National University Hospital, Blegdamsvej 9,  
2100 Copenhagen, Denmark.

<sup>b</sup>Institut de Biologie Physico-chimique (IBPC), CNRS/Université Paris Diderot, Paris 75005,  
France.

<sup>c</sup>Department of Infectious Diseases, Rigshospitalet, The National University Hospital,  
Copenhagen, Denmark.

<sup>d</sup>CIVI Biopharma Inc., 5425 Wisconsin Avenue 6th Floor, Chevy Chase, MD 20815, Washington  
DC, USA.

<sup>e,\*</sup>Nuffield Department of Clinical Neurosciences, Division of Clinical Neurology, Weatherall  
Institute of Molecular Medicine, University of Oxford, John Radcliffe Hospital, Oxford, United  
Kingdom.

<sup>§</sup>These authors contributed equally to this work.

\*Corresponding author: Astrid Iversen, e-mail: [astrid.iversen@ndcn.ox.ac.uk](mailto:astrid.iversen@ndcn.ox.ac.uk)

Running title: Simple, biosafe RNA extraction for SARS-CoV-2 testing

22 **ABSTRACT**

23 The SARS-CoV-2 pandemic has created an urgent need for large amounts of diagnostic tests to  
24 detect viral RNA, which commercial suppliers are increasingly unable to deliver. In addition to the  
25 lack of availability, the current methods do not always fully inactivate the virus. Together, this calls  
26 for the development of safer methods for extraction and detection of viral RNA from patient  
27 samples that utilise readily available reagents and equipment present in most standard laboratories.  
28 We present a rapid and straightforward RNA extraction protocol for inactivating the SARS-CoV-  
29 2 virus that uses standard lab reagents. This protocol expands analysis capacity as the inactivated  
30 samples can be used in RT-qPCR detection tests at laboratories not otherwise classified for viral  
31 work. The method circumvents the need for commercial RNA purification kits, takes about 30  
32 minutes from swab to PCR-ready viral RNA, and enables downstream detection of SARS-CoV-2  
33 by RT-qPCR with very high sensitivity (~4 viral RNA copies per RT-qPCR). In summary, we  
34 present a rapid, safe and sensitive method for high-throughput detection of SARS-CoV-2, that can  
35 be conducted in any laboratory equipped with a qPCR machine.

36

37

## 38 INTRODUCTION

39 In mid-December 2019, reports emerged that patients in Wuhan, Hubei province, China, were  
40 suffering from atypical pneumonia, and by start-January, the causative agent, severe acute  
41 respiratory syndrome coronavirus 2 (SARS-CoV-2), was identified (1, 2). The disease was named  
42 coronavirus disease 2019 (COVID-19). The initial epicentre of virus spread seems to have been  
43 the Huanan seafood wholesale market in Wuhan. Although the SARS-CoV-2 genome is very  
44 similar to bat SARS-CoV-like coronaviruses (~96%), it carries unique sequence motifs in the  
45 receptor-binding domain (RBD) of the Spike protein that binds to the human angiotensin-  
46 converting enzyme 2 (ACE2) receptor (3). These differences suggest that natural selection in an  
47 intermediate host species optimised binding of SARS-CoV-2 to ACE2, and facilitated transmission  
48 to, and spread between, humans. By mid-January 2020, the virus was found in Thailand and Japan  
49 following which it spread worldwide (4, 5). As of June 2020, the US had the largest number of  
50 identified SARS-CoV-2 infected individuals, but also several European countries, e.g., Italy, Spain,  
51 United Kingdom, and France have large numbers of COVID-19 patients (6). As of today, cases of  
52 COVID-19 are rapidly increasing in India, Mexico and parts of Africa and South America.

53  
54 The possibility to rapidly test large numbers of individuals for the presence of SARS-CoV-2 is a  
55 vital component in containing viral spread, in understanding the infectious fatality rate, and in  
56 subsequently guiding the controlled reopening of our societies. In medical laboratories, the  
57 presence of SARS-CoV-2 is commonly detected in a two-step process, where each step requires  
58 different kits. Step one is the RNA extraction from patient swabs usually performed using a kit  
59 from Qiagen or Roche (7), and step two is the detection of SARS-CoV-2, often achieved by a  
60 reverse-transcriptase quantitative polymerase chain reaction (RT-qPCR). With the rapidly growing  
61 need for SARS-CoV-2 tests, commercial supplies are increasingly falling short on kits for both

62 steps, thereby creating a need for alternative methods that utilise readily available reagents and  
63 equipment present in most standard laboratories.

64

65 A method, which combines a high molar acidic guanidinium isothiocyanate (GITC) solution,  
66 phenol and chloroform (collectively termed GPC), is broadly used to extract intact RNA from  
67 diverse biological samples (8, 9). The standard protocol for RNA-extraction by GCP is lengthy and  
68 requires significant expertise in handling RNA, making it unsuitable for large-scale screening  
69 programs. Here, we present a much-simplified version of the GPC-extraction method that  
70 overcomes these limitations while still providing inactivated, viral RNA that is compatible with  
71 downstream RT-qPCR detection. The method enables detection of  $\sim 4$  viral RNA copies per RT-  
72 qPCR, corresponding to  $\sim 10^4$  viral RNA copies on the swab. This detection limit is substantially  
73 lower than the average virus load per nasopharyngeal (NP) or oropharyngeal (OP) swab from  
74 symptoms onset to day five ( $6.76 \times 10^5$  copies per swab) and later during the disease course  
75 ( $3.44 \times 10^5$ ) (10, 11). In addition to the protocol simplification, this modified method further offers  
76 safe working conditions for healthcare personnel as the GPC solution is known to rapidly and fully  
77 inactivate viruses of the corona family, e.g., MERS-CoV (12). The efficient viral inactivation  
78 enables the simplified GCP-extraction method to be used at laboratories not classified for viral  
79 work, when on-site capacity at authorised hospital laboratories presents an issue, thereby expanding  
80 testing capacity.

81

82 In summary, we propose a rapid, safe and sensitive method for high-throughput detection of SARS-  
83 CoV-2, that can be conducted in any laboratory equipped with an RT-qPCR machine, using  
84 inexpensive and readily available reagents.

85

## 86 **MATERIALS AND METHODS**

### 87 **Protocol outline**

88 The method comprises the following four steps.

- 89 1. Patient sampling by NP or OP swabs.
- 90 2. Addition of the GPC reagents that instantly inactivates the virus and protects the released  
91 viral RNA genome from enzymatic degradation.
- 92 3. Extraction of RNA in 2 simple steps.
- 93 4. RT-qPCR to detect SARS-CoV-2 RNA in the patient sample.

94

### 95 **Sample preparation and RNA extraction using the simplified GPC-extraction method**

96 We obtained OP and NP samples from one hospitalised COVID-19 patient who had tested virus-  
97 positive three weeks earlier (cobas® SARS-CoV-2 test, Roche diagnostics), from three individuals  
98 who had previously tested SARS-CoV-2 positive, but tested negative on the day of sampling  
99 (cobas® SARS-CoV-2 test, Roche diagnostics), and from a healthy individual. NP and OP swabs  
100 were collected using FLOQSwabs® (COPAN, 552C), placed in transport tubes, sealed and  
101 transferred to the laboratory. Each swab was incubated for 5 min at room temperature in an  
102 Eppendorf tube containing 1.1 mL TRI-reagent (T9424, Sigma), after which the swab was  
103 discarded, and 200 µL of chloroform was added. This sample/GPC mixture was vortexed for 30  
104 sec, incubated for 3 min at room temperature, centrifuged for 15 min 12.000 g at 4°C, after which  
105 10 µL of the upper aqueous phase was carefully transferred to a new tube without disturbing the  
106 interphase. The 10 µL sample was diluted with RNase-free water as detailed below.

107

### 108 **Dilution series of RNA extracted from OP and NP samples**

109 To test the effect of GITC on the quality of both one-step and two-step RT-qPCR reactions, we  
110 created dilution series of the OP and NP samples that allowed the final dilution in the subsequent  
111 RT-reaction of the RT-qPCR to range from 8x to 100x (**Figure 1**). For example, to achieve a 100x  
112 final dilution in the RT-reaction of a 25  $\mu$ L one-step RT-qPCR, the 10  $\mu$ L sample was mixed with  
113 190  $\mu$ L RNase-free water to a dilution of 20x, followed by 5  $\mu$ L of this sample mixed in a 25  $\mu$ L  
114 one-step RT-qPCR to a final dilution of 100x.

115

### 116 **Two-step RT-qPCR against human B2M mRNA**

117 The effect of GITC on RT-qPCR components was examined by amplifying beta-2-microglobulin  
118 (B2M) mRNA (13) in the dilution series of extracted RNA from OP and NP samples from a healthy  
119 individual, in an RT-qPCR run in two separate steps. The reverse transcription reaction (20  $\mu$ L)  
120 contained 2  $\mu$ L 10x M-MuLV buffer (B0253S, New England Biolabs), 1  $\mu$ L of 50  $\mu$ M Oligo 18 dT  
121 (SO132, Thermo Fisher), 1  $\mu$ L of 50 ng/ $\mu$ L random hexamers (18091050, Invitrogen), 1  $\mu$ L of 10  
122 mM of deoxynucleotide triphosphate (dNTPs) (180912050, Invitrogen), 0.2  $\mu$ L of 40 U/ $\mu$ L RNase  
123 inhibitor (3335402001, Roche), 5  $\mu$ L of the RNA extraction sample (diluted from 2x to 25x), 8.8  
124  $\mu$ L RNase-free H<sub>2</sub>O, and 1  $\mu$ L of 200 U M-MuLV reverse transcriptase enzyme (B0253S, New  
125 England Biolabs). Negative controls were reactions without the RT enzyme and without sample,  
126 and the positive control was RNA isolated from HeLa cells. The RT-reaction was performed in  
127 Veriti™ 96-Well Thermal cycler (Applied Biosystems) (5 min at 25C, 1 h at 42C, and 20 min at  
128 65C). The qPCR reaction (10  $\mu$ L) contained 0.5  $\mu$ L of the 10  $\mu$ M B2M forward primer (5'-TGC  
129 CTG CCG TGT GAA CCA TGT-3'), 0.5  $\mu$ L of the 10  $\mu$ M B2M reverse primer (5'-TGC GGC  
130 ATC TTC AAA CCT CCA TGA-3'), 1  $\mu$ L of the RT-reaction, 3  $\mu$ L RNase-free H<sub>2</sub>O, 5  $\mu$ L  
131 PowerUp SYBR Green Master Mix (A25741, Thermo Fisher). Reactions were set up in a 384-well

132 plate and run in a QuantStudio 12K Flex Real-Time PCR System (4471081, Applied Biosystems)  
133 (2 min at 50C, 2 min at 95C, followed by 40 cycles of 95C for 15 sec; 60C for 1 min). Finally, a  
134 melting curve was recorded for 15 sec. at 95°C, 1 min at 60°C and 15 sec at 95°C. Data were  
135 analysed using QuantStudio™ 12K Flex Software. To confirm that only mRNA was amplified, the  
136 reactions were analysed by gel electrophoresis (data not shown). The B2M qPCR reaction proceeds  
137 with a forward primer placed in exon 2 and a reverse primer spanning the exon 3/4 junction to  
138 avoid amplification of the genomic B2M gene. With B2M cDNA, the primers produce an amplicon  
139 of 97 nucleotides, whereas the amplicon from the B2M gene itself spans 1974 nucleotides.

140

#### 141 **One-step RT-qPCR against SARS-CoV-2**

142 The effect of GITC on a corresponding one-step SARS-CoV-2 RT-qPCR reaction was examined  
143 using the dilution series of extracted RNA from OP and NP samples from the COVID-19 patient.  
144 SARS-CoV-2 specific RT-qPCR was also performed on samples from three previously SARS-  
145 CoV-2 positive, and a true negative, individual, to examine if non-specific amplification might  
146 occur. Three negative controls were used; NP and OP samples from a healthy individual and a test  
147 without sample. A primer and detection probe set against human RNase P mRNA was used as an  
148 internal positive control. The RT-qPCR was performed using SuperScript™ III One-Step RT-PCR  
149 System with Platinum™ Taq DNA Polymerase (12574-026, Invitrogen). Each 25 µL reaction  
150 contained 5 µL of sample, 12.5 µL of the 2x Superscript™ III reaction mix (a buffer containing  
151 0.4 mM of each dNTP and 3.2 mM MgSO<sub>4</sub>), 0.4 µL 50 mM MgSO<sub>4</sub>, 0.05 µL of 20 µg/µL (1 µg  
152 BSA/reaction) of nonacetylated bovine serum albumin (BSA, 10711454001, Roche), 1 µL  
153 SuperScript™ III RT/Platinum *Taq* Mix and 1.85 µL of primer/probe mix (2019-nCoV CDC EUA  
154 Kit, 10006606, IDT). Primer and probe concentrations are outlined in **Table 1**. The thermal cycling

155 conditions were: 55°C for 30 min, 95°C for 3 min, then 45 cycles of 95°C for 15 sec; 62°C for 30  
156 sec; 68°C for 30 sec, followed by a final 68°C elongation step for 5 min on QuantStudio 12K Flex  
157 Real-Time PCR System (4471081, Applied Biosystems). Data were analysed using QuantStudio™  
158 12K Flex Software.

159

## 160 **Preparation of a SARS-CoV-2 RNA dilution series using the GPC-extraction method**

161 An OP sample swab was collected from a healthy individual and processed as described above.  
162 From the upper aqueous phase, 7.5 µL was carefully transferred to a new tube without disturbing  
163 the interphase, and spiked with 2.5 µL of Twist Synthetic SARS-CoV-2 RNA Control 1  
164 (MT007544.1) to make a stock of 250,000 RNA copies/µL. This stock solution was used in a serial  
165 dilution with the remaining, un-spiked, aqueous phase to create a series of positive controls  
166 containing 3125, 781, 195, 48, 12, 3 or 0.76 RNA copies/µL. From each of these, 5 µL was used  
167 in a 25 µL one-step RT-qPCR reaction thus achieving a final number of 15625, 3906, 977, 244,  
168 61, 15 and 3.8 SARS-CoV-2 RNA copies per one-step RT-qPCR reaction.

169

## 170 **RESULTS**

### 171 **GITC/RNA dilution thresholds compatible with efficient two-step RT-qPCR**

172 To investigate how GITC affected the efficiency of each step of an RT-qPCR reaction, we set up  
173 two-step B2M RT-qPCRs in the presence of varying concentrations of GITC. The B2M mRNA  
174 was extracted from OP and NP swabs from a healthy individual to mimic how patient material is  
175 obtained for SARS-CoV-2 testing. First, swabs were treated with the GPC solution. After mixing  
176 and centrifugation, this solution separated into an upper aqueous phase containing RNA, GITC and  
177 other salts, an interphase and a lower organic phase both containing DNA and proteins. The upper  
178 RNA/GITC aqueous phase was retrieved and diluted and used directly in an RT reaction at different



179 final dilutions (ranging from 8x to 100x) followed by detection of B2M by qPCR with SYBR green  
180 (**Figure 1**). Consistent with GITC being a concentration-dependent mixed inhibitor (14), amplicons  
181 only appeared in the qPCR when the initial RT step was conducted with GITC dilutions  $\geq 50x$   
182 (**Figure 1**). Using the NP swab samples, amplicons were detected in the qPCR reaction with cycle  
183 threshold (Ct) values of 30-31 at a 50x GITC dilution. At the higher GITC dilution (100x),  
184 amplicons were detected at a later time with Ct-values  $> 35$ , likely due to the increased dilution of  
185 the B2M mRNA template in these reactions. When OP swabs were used, amplicons were similarly  
186 detected at  $\geq 50x$  GITC dilutions (Fig. 1), but with a slightly higher Ct-values of 36. This difference  
187 in Ct thresholds for NP and OP swabs samples likely reflects differences in the amounts of cells  
188 obtained by the different sampling methods. Together, these results confirm that the RT-qPCR can  
189 proceed in the presence of low concentrations of GITC. The size of the B2M amplicons was  
190 examined using gel electrophoresis, and all amplicons were found to have the expected size of 97  
191 nucleotides; no amplification of the genomic B2M gene was observed, and no amplicons were  
192 present in reactions without RT or sample. These results confirmed that the simplified GPC-  
193 extraction method is capable of providing RNA that can serve as a template in RT-qPCR.

194

#### 195 **GITC/RNA dilution thresholds compatible with efficient one-step SARS-CoV-2 RT-qPCR**

196 We next tested if the simplified GPC-extraction method was compatible with detection of SARS-  
197 CoV-2 in a hospitalised COVID-19 patient who had tested virus-positive three weeks earlier using  
198 the cobas® SARS-CoV-2 test (Roche diagnostics). OP and NP samples were obtained from the  
199 patient, three former COVID-19 patients, and a healthy individual. For SARS-CoV-2 detection,  
200 we used a one-step RT-qPCR (11) with two different sets of primers and detection probes (N1 and  
201 N2) (15) (**Table 1**) specific for the conserved SARS-CoV-2 nucleoprotein (N) gene.

202

203 RNA was extracted from the OP and NP swabs and based on the B2M RT-qPCR results, the  
204 aqueous phase with RNA and GITC was used at a 50x, 75x, or 100x final dilution in the one-step  
205 SARS-CoV-2 RT-qPCRs. The OP swab sample from the COVID-19 patient yielded Ct-values of  
206 27 at the 100x dilution for both duplicates for the N1 primer set, and Ct-values of 31 for both  
207 duplicates for the N2 primer set (**Figure 2a**). The RNase P internal control PCR resulted in Ct-  
208 values of 30 for both duplicates. No amplification was detected using the NP sample, which could  
209 reflect intermittent, low and/or no viral shedding from NP cells at this time (11), or problems with  
210 sampling from the nasopharynx. The three former COVID-19 patients who tested negative for  
211 SARS-CoV-2 using the cobas® SARS-CoV-2 test on the day of comparison, and the healthy  
212 control, were virus-negative and RNase P positive. These results confirmed that the simplified  
213 GPC-extraction method, combined with a one-step RT-qPCR reaction, can be used to detect SARS-  
214 CoV-2 in an infected individual and that unspecific amplification does not seem to occur.

215

#### 216 **The simplified GPC-extraction allows detection of ~4 copies of SARS-CoV-2 per RT-qPCR**

217 To assess the sensitivity of the COVID-19 diagnostic test flow, the one-step RT-qPCR was  
218 performed on a dilution series of a synthetic SARS-CoV-2 control RNA. RNA from an OP swab  
219 from a healthy individual was extracted using the simplified GPC-extraction method, after which  
220 some of the aqueous phase was spiked with the SARS-CoV-2 synthetic RNA to a final  
221 concentration of 250000 copies/ $\mu$ L. This spiked sample was used to create a dilution series ranging  
222 from 15625 to 3.8 copies/ $\mu$ L using the un-spiked aqueous phase from the sample as the diluent to  
223 retain consistent amounts of GITC and swab components in the RT-qPCRs. In accordance with the  
224 COVID-19 diagnostic test flow, each spiked sample was used at a final GITC dilution of 100x and

225 SARS-CoV-2 RNA was detected with N1 or N2 primers, and using RNase P primers as positive  
226 control.

227

228 Amplicons were detected in all dilutions of the SARS-CoV-2 synthetic RNA down to 3.8 copies  
229 with the N1 primers (**Figure 2b**). This sensitivity is consistent with that reported for other primers  
230 that target the N gene (N-Sarbeco, Tib-Molbiol, Berlin, Germany) that showed a detection limit of  
231 8.3 copies/reaction when used with a commercial RNA extraction kit (MagNA Pure 96 system,  
232 Roche, Penzberg, Germany) and the same one-step RT-qPCR (11). The ability to detect ~4 copies  
233 of viral RNA in the RT-qPCR reaction translates into  $\sim 10^4$  viral copies per swab, which is more  
234 than 10 fold lower than the average virus load per NP or OP swab from symptoms onset to day five  
235 ( $6.76 \times 10^5$  copies per swab) and later ( $3.44 \times 10^5$  copies per swab) (10, 11). The N2 primers proved  
236 less sensitive, detecting synthetic RNA down to only 244 copies/reaction in our set-up. It cannot,  
237 however, be excluded that the sensitivity is nearer the next testing point of 61 copies/reaction. The  
238 negative control with no added virus showed no amplification, whereas efficient amplification was  
239 observed with all positive control reactions targeting RNase P. Together, these data demonstrate  
240 that the simplified GPC-extraction method allows for similar detection sensitivity in the one-step  
241 RT-qPCR as a currently utilised kit-based RNA extraction methods.

242

243 Based on combined experiments, we outlined a COVID-19 diagnostic test flow from patient-to-  
244 result that covers patient sampling, RNA extraction by the simplified GPC-extraction method, and  
245 one-step RT-qPCR detection (**Figure 3**).

246

247 **DISCUSSION**

248 The ability to test large segments of the population represents the most effective means of managing  
249 the SARS-CoV-2 pandemic and making informed decisions on the reopening of our societies. To  
250 date, such tests typically combine the use of a front-end RNA extraction kit and a one-step RT-  
251 qPCR detection kit. Many commercial RNA extraction kits have been shown to not fully inactivate  
252 the virus, potentially putting healthcare personnel that handles the samples at risk of SARS-CoV-  
253 2 infection (18). Similarly, several recently published quick RNA-extraction methods (7, 16, 17)  
254 that rely on inactivation of the virus by heat, do not completely inactivate the virus (18). In contrast,  
255 the GPC-solution fully inactivates corona viruses such as MERS-CoV (12), adding a desirable  
256 safety aspect to this method.

257

258 The GITC salt is a mixed inhibitor of PCRs, affecting both the function of polymerase enzymes  
259 and the melting temperature of primer/template duplexes (14). GITC is therefore usually removed  
260 from the RNA by precipitation of the RNA with isopropanol, centrifugation and washing of the  
261 RNA pellet with 70% ethanol after which the pellet is dissolved in H<sub>2</sub>O. This process requires  
262 expertise in RNA handling as GITC can co-precipitate with the RNA, and too vigorous pipetting  
263 or wrongly handled RNA pellet solvation can result in RNA loss. A previous study demonstrated  
264 that GITC had only a modest inhibitory effect at a concentration of 9 µg/µL (~75 mM) (14),  
265 prompting us to speculate that the RNA/GITC aqueous phase could be used directly in RT-qPCR  
266 without precipitation, centrifugation, washing and solvation if the solution was diluted below the  
267 ~75mM threshold. Our results robustly demonstrate that a dilution of 50x and 100x of the aqueous  
268 phase is compatible with one- and two-step RT-qPCRs, respectively, and that approximately ~4  
269 copies of SARS-CoV-2 can be detected, equivalent to ~10<sup>4</sup> virus copies per NP or OP swab. The

270 difference between the one- and two-step RT-qPCRs results are likely due to the extended period  
271 of exposure of the PCR polymerase to GITC salts during the latter procedure.

272

273 As the simplified GPC-extraction method presented here rapidly inactivates the virus, it allows  
274 detection by RT-qPCR in laboratories not classified to handle infectious air-borne viruses. The  
275 GCP-solution also denatures proteins to prevent enzymatic degradation of the viral RNA genome,  
276 which facilitates sample storage prior to extraction when needed. Moreover, the simplified GCP-  
277 extraction method utilises equipment and reagents common to clinical and molecular biology  
278 laboratories, thus removing the reliance on commercial RNA-extraction kits that presents a  
279 bottleneck for large-scale SARS-CoV-2 testing. The simplified GPC-extraction method shortens  
280 the time from patient sampling to testing relative to using the full GPC-extraction protocol (19),  
281 but, more importantly, excludes the steps that require experience with RNA precipitation, washing  
282 and reconstitution. The resulting lowered complexity makes this simplified method amenable to  
283 non-RNA-experts, thereby increasing the number of laboratories at which these tests can be  
284 performed. The sensitivity of the downstream RT-qPCR was similar to that reported previously  
285 (11) and appears superior to that of other RT-qPCR protocols, including the cobas® SARS-CoV-  
286 2 test (20). The difference in sensitivity between the N1 and N2 primer sets is important when  
287 evaluating the result of SARS-CoV-2 test using both primers sets as confirmatory for the infection,  
288 since a negative result for the N2 primers, but positive result for the N1 primers, could simply  
289 reflect a lower viral load in the tested infected individual, compared to a patient with two positive  
290 results.

291

292 In the here-presented protocol we add the virus-inactivating TRI-reagent after the collected samples  
293 are transferred to the laboratory, where this solution can be safely handled in a fume hood. It is

294 tempting to speculate that a test tube could be developed that enables contact between the swab  
295 and the TRI-reagent at the point of sampling, without exposing testing personal to the reagent, thus  
296 inactivating the virus at the earliest possible time point in the diagnostic procedure.

297

298 In summary, our protocol for RNA extraction relieves the dependence on expensive commercial  
299 kits that have become a bottleneck in the diagnosis of the virus, and ensures the safety of healthcare  
300 workers testing for SARS-CoV-2 infections, which in turn expands the number of testing  
301 laboratories and thus testing capacity.

302

### 303 **ACKNOWLEDGEMENT**

304 We are grateful to Camilla Thomsen for sample handling and processing.

305

### 306 **FUNDING STATEMENT**

307 No external funding was obtained for this work.

308

### 309 **AUTHOR DECLARATIONS**

310 The authors declare no competing interests.

311

312 Standard ethical guidelines and regulations regarding method development and optimisation were  
313 followed. All necessary patient/participant consent has been obtained and the appropriate  
314 institutional forms have been archived. No project-specific ethical approval was necessary.

315

316 All data are available from the authors upon request.

317

318 **REFERENCES**

- 319 1. Wu F, Zhao S, Yu B, Chen YM, Wang W, Song ZG, Hu Y, Tao ZW, Tian JH, Pei YY,  
320 Yuan ML, Zhang YL, Dai FH, Liu Y, Wang QM, Zheng JJ, Xu L, Holmes EC, Zhang YZ.  
321 2020. A new coronavirus associated with human respiratory disease in China. *Nature*  
322 579:265–269.
- 323 2. Zhou P, Yang X Lou, Wang XG, Hu B, Zhang L, Zhang W, Si HR, Zhu Y, Li B, Huang  
324 CL, Chen HD, Chen J, Luo Y, Guo H, Jiang R Di, Liu MQ, Chen Y, Shen XR, Wang X,  
325 Zheng XS, Zhao K, Chen QJ, Deng F, Liu LL, Yan B, Zhan FX, Wang YY, Xiao GF, Shi  
326 ZL. 2020. A pneumonia outbreak associated with a new coronavirus of probable bat  
327 origin. *Nature* 579:270–273.
- 328 3. Andersen KG, Rambaut A, Lipkin WI, Holmes EC, Garry RF. 2020. The proximal origin  
329 of SARS-CoV-2. *Nat Med* 26:450–452.
- 330 4. Okada P, Buathong R, Phuygun S, Thanadachakul T, Parnmen S, Wongboot W,  
331 Waicharoen S, Wacharapluesadee S, Uttayamakul S, Vachiraphan A, Chittaganpitch M,  
332 Mekha N, Janejai N, Iamsirithaworn S, Lee RTC, Maurer-Stroh S. 2020. Early  
333 transmission patterns of coronavirus disease 2019 (COVID-19) in travellers from Wuhan  
334 to Thailand, January 2020. *Eurosurveillance* 25.
- 335 5. Ralph R, Lew J, Zeng T, Francis M, Xue B, Roux M, Ostadgavahi AT, Rubino S, Dawe  
336 NJ, Al-Ahdal MN, Kelvin DJ, Richardson CD, Kindrachuk J, Falzarano D, Kelvin AA.  
337 2020. 2019-nCoV (Wuhan virus), a novel Coronavirus: Human-to-human transmission,  
338 travel-related cases, and vaccine readiness. *J Infect Dev Ctries* 14:3–17.
- 339 6. Coronavirus Pandemic (COVID-19) - Statistics and Research - Our World in Data.
- 340 7. Bruce EA, Tighe S, Hoffman JJ, Laaguiby P, Gerrard DL, Diehl SA, Leonard DGB,  
341 Huston CD, Kirkpatrick BD, Crothers JW, Dragon J, Botten J. 2020. RT-qPCR

- 342 DETECTION OF SARS-CoV-2 RNA FROM PATIENT NASOPHARYNGEAL SWAB  
343 USING QIAGEN RNEASY KITS OR DIRECTLY VIA OMISSION OF AN RNA  
344 EXTRACTION STEP. bioRxiv Prepr.
- 345 8. Chomczynski P, Sacchi N. 1987. Single-Step Method of RNA Isolation by Acid  
346 Guanidinium Extraction. *Anal Biochem* 162:156–159.
- 347 9. Chomczynski P, Sacchi N. 2006. The single-step method of RNA isolation by acid  
348 guanidinium thiocyanate-phenol-chloroform extraction: Twenty-something years on. *Nat*  
349 *Protoc* 1:581–585.
- 350 10. Wölfel R, Corman VM, Guggemos W, Seilmaier M, Zange S, Müller MA, Niemeyer D,  
351 Jones TC, Vollmar P, Rothe C, Hoelscher M, Bleicker T, Brünink S, Schneider J, Ehmman  
352 R, Zwirgmaier K, Drosten C, Wendtner C. 2020. Virological assessment of hospitalized  
353 patients with COVID-2019. *Nature* 1–14.
- 354 11. Corman VM, Landt O, Kaiser M, Molenkamp R, Meijer A, Chu DK, Bleicker T, Brünink  
355 S, Schneider J, Schmidt ML, Mulders DG, Haagmans BL, van der Veer B, van den Brink  
356 S, Wijsman L, Goderski G, Romette JL, Ellis J, Zambon M, Peiris M, Goossens H,  
357 Reusken C, Koopmans MP, Drosten C. 2020. Detection of 2019 novel coronavirus (2019-  
358 nCoV) by real-time RT-PCR. *Euro Surveill* 25:1–8.
- 359 12. Kochel TJ, Kocher GA, Ksiazek TG, Burans JP. 2017. Evaluation of TRIzol LS  
360 inactivation of viruses. *Appl Biosaf* 22:52–55.
- 361 13. Tissue expression of B2M - Summary - The Human Protein Atlas.
- 362 14. Mccord B, Pionzio A, Thompson R. 2015. Analysis of the effect of a variety of PCR  
363 inhibitors on the amplification of DNA using real time PCR, melt curves and STR  
364 analysis.
- 365 15. Centers for Disease Control and Prevention. 2020. CDC 2019-Novel Coronavirus (2019-



- 366 nCoV) Real-Time RT-PCR Diagnostic Panel. CDC Protoc.
- 367 16. Ladha A, Joung J, Abudayyeh OO, Gootenberg JS. 2020. A 5-min RNA preparation  
368 method for COVID-19 detection with RT-qPCR.
- 369 17. Fomsgaard A, Rosenstierne MW. 2020. An alternative workflow for molecular detection  
370 of SARS-CoV-2 - escape from the NA extraction kit-shortage. medRxiv.
- 371 18. Pastorino B, Touret F, Gilles M, Lamballerie X De, Remi N. 2020. Evaluation of heating  
372 and chemical protocols for inactivating SARS-CoV-2. BioRxiv Prepr.
- 373 19. Won J, Lee S, Park M, Kim TY, Park MG, Choi BY, Kim D, Chang H, Kim VN, Lee CJ.  
374 2020. Development of a Laboratory-safe and Low-cost Detection Protocol for SARS-CoV-  
375 2 of the Coronavirus Disease 2019 (COVID-19). *Exp Neurobiol* 29:1–13.
- 376 20. False Negatives in Quick COVID-19 Test Near 15 Percent: Study | The Scientist  
377 Magazine®.
- 378  
379

380 **FIGURES**

381

382 **Figure 1**

383

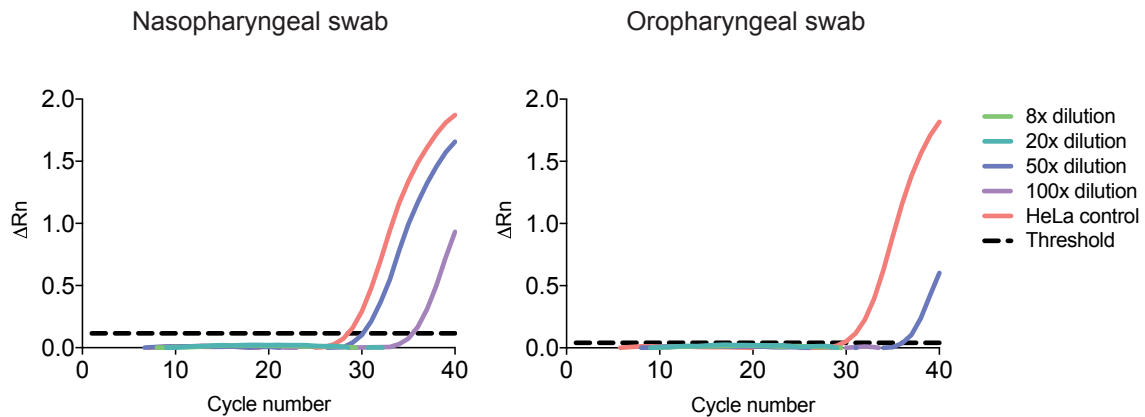

384

385 **Figure 1. The effect of GITC salts on the efficiency of a two-step B2M RT-qPCR using**  
386 **dilutions of the aqueous phase from the GPC extraction of an NP and OP sample.**

387 A representative amplification plot of  $\Delta R_n$  against PCR cycle number for the two-step B2M RT-  
388 qPCR with different dilutions of the RNA-GITC solution in the RT reaction (ranging from 8x to  
389 100x). No amplification was observed at 8x and 20x dilutions. The threshold is shown as a black  
390 dashed line and corresponds to 0.116 for the NP swab and 0.040 for the OP swab.  $\Delta R_n$ :  $R_n$  (the  
391 fluorescence of the reporter dye divided by the fluorescence of the passive reference dye ROX)  
392 minus the baseline (black dashed line). The amplifications were performed in duplicate.

393

394

395

396

397

398

399 **Figure 2**

400

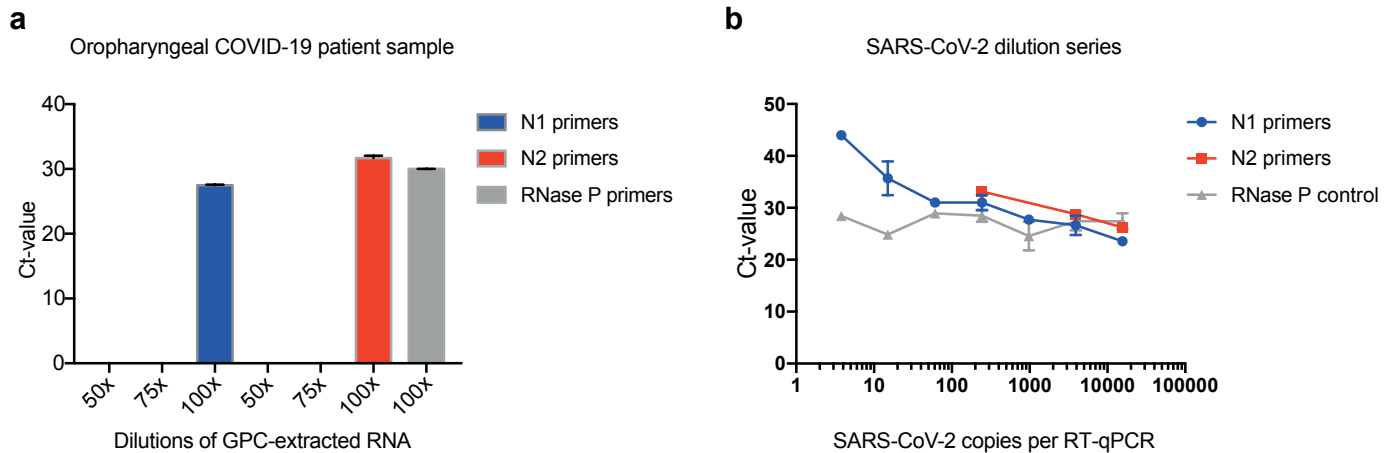

401

402

403 **Figure 2. The effect of GITC and other salts on the efficiency of SARS-CoV-2 RT-qPCR and**  
404 **assay sensitivity.**

405 **a.** The effect of GITC and other salts on SARS-CoV-2 RT-qPCR detection of virus in the diluted  
406 aqueous phase of samples from a COVID-19 patient. Cycle threshold (Ct) for RT-qPCRs targeting  
407 the N-gene on the SARS-CoV-2 virus RNA, with viral RNA extracted from an OP swab from  
408 confirmed COVID-19 patient. The internal control RNase P RT-qPCR amplifications were  
409 negative at 50x and 75x dilutions (not shown).

410 **b.** Determination of the sensitivity of the SARS-CoV-2 one-step RT-qPCR protocol using synthetic  
411 SARS-CoV-2 RNA combined with RNA extracted from an OP swab from a healthy individual  
412 using the GPC-extraction method. The concentration of GITC and other salts were constantly kept  
413 at a 100x dilution in each of the diluted virus samples. Cycle threshold (Ct) for RT-qPCRs targeting  
414 the N-gene on the synthetic SARS-CoV-2 virus RNA using the N1 and N2 primer sets,  
415 respectively. Amplification of RNase P was used as an internal control. The amplifications were  
416 performed in duplicate.

417 **Figure 3**

418

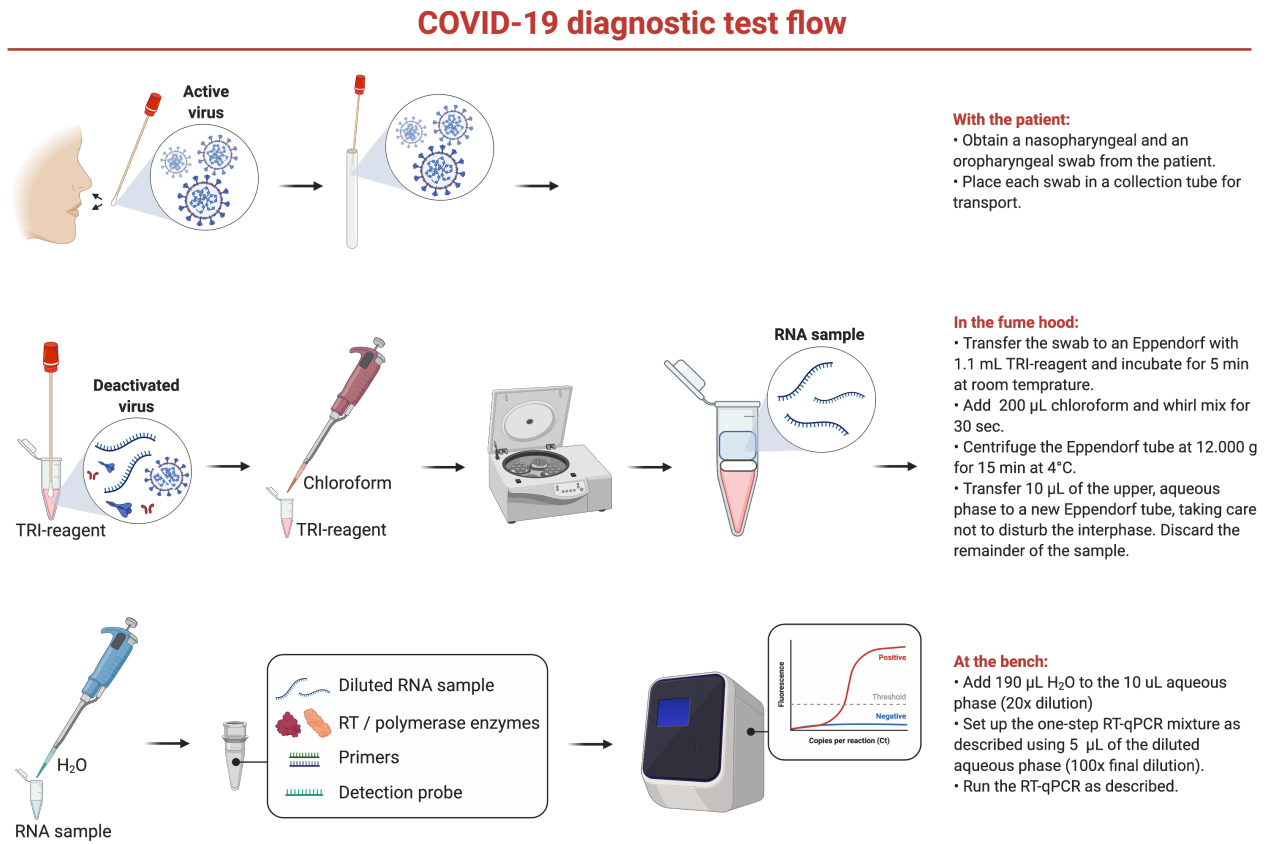

419

420 **Figure 3. Workflow for SARS-CoV-2 detection using the simplified GPC-extraction**

421 **method.**

422

423

424

425

426

427

428

429

430 **TABLES**

431

432 **Table 1. Overview of primers and probes used for SARS-CoV-2 detection.** IPC: internal  
 433 positive control, fw: forward primer, rv: reverse primer, pr: probe. Genome pos: genome  
 434 position according to SARS-CoV-2 GenBank NC\_004718.

| Species target | Target gene (genome pos.) | Oligo name | Oligonucleotide sequence (5'-3')  | Conc. qPCR | Ref. |
|----------------|---------------------------|------------|-----------------------------------|------------|------|
| SARS-CoV-2     | N-gene (28287-28358)      | N1-fw      | GACCCCAAATCAGCGAAAT               | 500 nM     | (15) |
|                |                           | N1-rv      | TCTGGTACTGCCAGTTGAATCTG           | 500 nM     | (15) |
|                |                           | N1-pr      | FAM-ACCCCGCATTACGTTTGGTGGACC-BHQ1 | 125 nM     | (15) |
| SARS-CoV-2     | N-gene (29164-29230)      | N2-fw      | TTACAAACATGGCCGCAAA               | 500 nM     | (15) |
|                |                           | N2-rv      | GCGCGACATTCCGAAGAA                | 500 nM     | (15) |
|                |                           | N2-pr      | FAM-ACAATTTGCCCCAGCGCTTCAG-BHQ1   | 125 nM     | (15) |
| Human IPC      | RNase P                   | RNaseP-fw  | AGATTTGGACCTGCGAGCG               | 500 nM     | (15) |
|                |                           | RNaseP-rv  | GAGCGGCTGTCTCCACAAGT              | 500 nM     | (15) |
|                |                           | RNaseP-pr  | FAM-TTCTGACCTGAAGGCTCTGCGCG-BHQ1  | 125 nM     | (15) |

435

436
